# Supplementary material for: Identification of new microRNA-regulated genes by conserved targeting in plant species
Source: PubMed Central journal article supplement — Nucleic Acids Res. 2012 Jul 5;40(18):8893–904. doi: 10.1093/nar/gks625 (PMC3467045; doi:10.1093/nar/gks625), 2012-07-05
Supplement: supp_gks625_nar-00902-c-2012-File009.pdf [file supp_gks625_nar-00902-c-2012-File009.pdf]

## **SUPPLEMENTARY DATA**

**Supplementary Table 1:** Conserved miRNA families in *Arabidopsis*, poplar and rice.

**Supplementary Table 2:** List of species used in this study

**Supplementary Table 3:** Validated targets in *Arabidopsis thaliana*

**Supplementary Table 4:** Potential targets identified in this study

**Supplementary Table 5:** Potential targets present in at least 10 species

**Supplementary Table 6:** Potential targets present in at least three *Solanaceae* species

**Supplementary Table 7:** Oligonucleotide primers used for RT-qPCR

**Supplementary Table 8:** Oligonucleotide primers used for 5'RACE

**Supplementary Figure 1:** Transcript levels of miR396 targets in transgenic plants overexpressing the miRNA

**Supplementary Figure 2:** Transcript levels of *NOZZLE* and *MYB33* in transgenic plants overexpressing miR159

**Supplementary Figure 3:** Presence of GU interactions in the new miRNA targets pairs

| miRNA  | TAG       | Species | AVG_ΔG <sup>1</sup> | Short_description                                                                         | Status in <i>Arabidopsis</i> |
|--------|-----------|---------|---------------------|-------------------------------------------------------------------------------------------|------------------------------|
| miR156 | AT5G50570 | 24      | -32,0               | squamosa promoter-binding protein, putative                                               | Validated                    |
| miR156 | AT2G42200 | 23      | -32,6               | SPL9 (SQUAMOSA PROMOTER BINDING PROTEIN-LIKE 9); transcription factor                     | Validated                    |
| miR156 | AT5G43270 | 22      | -32,6               | SPL2 (SQUAMOSA PROMOTER BINDING PROTEIN-LIKE 2); DNA binding / transcription factor       | Validated                    |
| miR156 | AT1G53160 | 21      | -32,0               | SPL4 (SQUAMOSA PROMOTER BINDING PROTEIN-LIKE 4); DNA binding / transcription factor       | Validated                    |
| miR156 | AT2G33810 | 20      | -30,4               | SPL3 (SQUAMOSA PROMOTER BINDING PROTEIN-LIKE 3); DNA binding / transcription factor       | Validated                    |
| miR156 | AT1G69170 | 14      | -32,4               | squamosa promoter-binding protein-like 6 (SPL6)                                           | Validated                    |
| miR156 | AT1G19910 | 13      | -28,1               | AVA-P2; ATPase/ proton-transporting ATPase, rotational mechanism                          | New potential target         |
| miR156 | AT3G15270 | 12      | -32,0               | SPL5 (SQUAMOSA PROMOTER BINDING PROTEIN-LIKE 5); DNA binding / transcription factor       | Validated                    |
| miR156 | AT4G34720 | 11      | -26,8               | AVA-P1; ATPase/ proton-transporting ATPase, rotational mechanism                          | Not present                  |
| miR156 | AT1G27370 | 10      | -32,5               | squamosa promoter-binding protein-like 10 (SPL10)                                         | Validated                    |
| miR156 | AT1G24120 | 7       | -26,0               | ARL1 (ARG1-LIKE 1); heat shock protein binding / unfolded protein binding                 | Not present                  |
| miR156 | AT1G27360 | 6       | -32,6               | squamosa promoter-binding protein-like 11 (SPL11)                                         | Validated                    |
| miR156 | AT1G18650 | 6       | -24,7               | PDCB3 (PLASMODESMATA CALLOSE-BINDING PROTEIN 3); callose binding / polysaccharide binding | Not present                  |
| miR156 | AT1G17720 | 5       | -25,1               | ATB BETA; nucleotide binding / protein phosphatase type 2A regulator                      | Not present                  |
| miR156 | AT1G44760 | 5       | -25,2               | universal stress protein (USP) family protein                                             | Not present                  |
| miR156 | AT3G07565 | 5       | -22,0               | DNA binding                                                                               | Not present                  |
| miR156 | AT3G21510 | 5       | -25,5               | AHP1 (HISTIDINE-CONTAINING PHOSPHOTRANSMITTER 1); histidine phosphotransfer kinase        | Not present                  |
| miR156 | AT3G26935 | 5       | -22,1               | zinc finger (DHHC type) family protein                                                    | Not present                  |
| miR156 | AT4G08980 | 5       | -23,2               | F-box family protein (FBW2)                                                               | Not present                  |
| miR156 | AT1G75630 | 4       | -28,8               | AVA-P4; ATPase                                                                            | New potential target         |
| miR156 | AT3G57920 | 4       | -32,8               | SPL15 (SQUAMOSA PROMOTER BINDING PROTEIN-LIKE 15); DNA binding / transcription factor     | Validated                    |
| miR156 | AT1G20330 | 4       | -29,0               | SMT2 (STEROL METHYLTRANSFERASE 2); S-adenosylmethionine-dependent methyltransferase       | Not present                  |
| miR156 | AT1G44191 | 4       | -26,7               |                                                                                           | Not present                  |
| miR156 | AT1G64090 | 4       | -25,9               | reticulon family protein (RTNLB3)                                                         | Not present                  |
| miR156 | AT1G68690 | 4       | -25,5               | ATP binding / protein kinase/ protein serine/threonine kinase                             | Not present                  |
| miR156 | AT2G18540 | 4       | -24,5               | cupin family protein                                                                      | Not present                  |
| miR156 | AT3G24550 | 4       | -24,6               | ATPERK1 (PROLINE EXTENSIN-LIKE RECEPTOR KINASE 1); ATP binding / protein kinase           | Not present                  |

|        |           |    |       |                                                                                                                                                                       |                                 |
|--------|-----------|----|-------|-----------------------------------------------------------------------------------------------------------------------------------------------------------------------|---------------------------------|
| miR156 | AT3G28770 | 4  | -28,2 | unknown protein                                                                                                                                                       | Not present                     |
| miR156 | AT4G22505 | 4  | -24,5 |                                                                                                                                                                       | Not present                     |
| miR156 | AT4G23160 | 4  | -24,9 | protein kinase family protein                                                                                                                                         | Not present                     |
| miR156 | AT4G23630 | 4  | -27,0 | BT11 (VIRB2-INTERACTING PROTEIN 1)                                                                                                                                    | Not present                     |
| miR156 | AT4G34350 | 4  | -23,8 | HDR (4-HYDROXY-3-METHYLBUT-2-ENYL DIPHOSPHATE REDUCTASE); 4-hydroxy-3-methylbut-2-en-1-yl diphosphate reductase/ 4-hydroxy-3-methylbut-2-en-1-yl diphosphate synthase | Not present                     |
| miR156 | AT5G11750 | 4  | -26,2 | ribosomal protein L19 family protein ATOMT1 (O-METHYLTRANSFERASE 1); caffeate O-methyltransferase/ myricetin 3"-O-methyltransferase/ quercetin 3-O-methyltransferase  | Not present                     |
| miR159 | AT5G06100 | 11 | -32,5 | MYB33 (MYB DOMAIN PROTEIN 33); DNA binding / transcription factor                                                                                                     | Validated                       |
| miR159 | AT3G11440 | 8  | -33,2 | MYB65 (MYB DOMAIN PROTEIN 65); DNA binding / transcription factor                                                                                                     | Validated                       |
| miR159 | AT4G27330 | 6  | -27,8 | SPL (SPOROCTELESS); protein binding / transcription factor                                                                                                            | New potential target: validated |
| miR159 | AT4G04885 | 6  | -26,9 | PCFS4 (PCF11P-SIMILAR PROTEIN 4); zinc ion binding                                                                                                                    | Not present                     |
| miR159 | AT2G32460 | 5  | -31,6 | MYB101; DNA binding / transcription factor                                                                                                                            | Validated                       |
| miR159 | AT1G10370 | 5  | -26,4 | ERD9 (EARLY-RESPONSIVE TO DEHYDRATION 9); glutathione transferase                                                                                                     | Not present                     |
| miR159 | AT1G13950 | 5  | -24,0 | ELF5A-1 (EUKARYOTIC ELONGATION FACTOR 5A-1); translation initiation factor                                                                                            | Not present                     |
| miR159 | AT1G78700 | 5  | -25,7 | brassinosteroid signalling positive regulator-related                                                                                                                 | Not present                     |
| miR159 | AT3G04090 | 5  | -25,5 | SIP1A (SMALL AND BASIC INTRINSIC PROTEIN 1A); water channel                                                                                                           | Not present                     |
| miR159 | AT3G19960 | 5  | -26,3 | ATM1 (ARABIDOPSIS THALIANA MYOSIN 1); motor                                                                                                                           | Not present                     |
| miR159 | AT3G24170 | 5  | -26,9 | ATGR1 (glutathione-disulfide reductase); FAD binding / NADP or NADPH binding / glutathione-disulfide reductase/ oxidoreductase                                        | Not present                     |
| miR159 | AT4G08170 | 5  | -29,3 | inositol 1,3,4-trisphosphate 5/6-kinase family protein                                                                                                                | Not present                     |
| miR159 | AT3G60460 | 4  | -30,5 | DUO1 (DUO POLLEN 1); DNA binding / transcription factor                                                                                                               | Validated                       |
| miR159 | AT1G09020 | 4  | -25,8 | SNF4 (HOMOLOG OF YEAST SUCROSE NONFERMENTING 4); protein kinase activator                                                                                             | Not present                     |
| miR159 | AT2G19810 | 4  | -27,7 | zinc finger (CCCH-type) family protein                                                                                                                                | Not present                     |
| miR159 | AT3G07565 | 4  | -33,5 | DNA binding                                                                                                                                                           | Not present                     |
| miR159 | AT3G12110 | 4  | -26,0 | ACT11 (actin-11); structural constituent of cytoskeleton                                                                                                              | Not present                     |
| miR159 | AT3G54210 | 4  | -27,2 | ribosomal protein L17 family protein                                                                                                                                  | Not present                     |
| miR159 | AT5G09810 | 4  | -26,5 | ACT7 (ACTIN 7); structural constituent of cytoskeleton                                                                                                                | Not present                     |
| miR159 | AT5G62000 | 4  | -28,3 | ARF2 (AUXIN RESPONSE FACTOR 2); protein binding / transcription factor                                                                                                | Not present                     |
| miR160 | AT2G28350 | 23 | -41,9 | ARF10 (AUXIN RESPONSE FACTOR 10); miRNA binding / transcription factor                                                                                                | Validated                       |

|        |           |    |       |                                                                                                                                                                      |                      |
|--------|-----------|----|-------|----------------------------------------------------------------------------------------------------------------------------------------------------------------------|----------------------|
| miR160 | AT4G30080 | 20 | -42,0 | ARF16 (AUXIN RESPONSE FACTOR 16); miRNA binding / transcription factor                                                                                               | Validated            |
| miR160 | AT1G77850 | 11 | -41,8 | ARF17 (AUXIN RESPONSE FACTOR 17); transcription factor                                                                                                               | Validated            |
| miR160 | AT4G28530 | 4  | -28,9 | anac074 (Arabidopsis NAC domain containing protein 74); transcription factor                                                                                         | Not present          |
| miR160 | AT5G09300 | 4  | -36,7 | 2-oxoisovalerate dehydrogenase, putative / 3-methyl-2-oxobutanoate dehydrogenase, putative / branched-chain alpha-keto acid dehydrogenase E1 alpha subunit, putative | Not present          |
| miR162 | AT1G01040 | 8  | -31,7 | DCL1 (DICER-LIKE 1); ATP-dependent helicase/ double-stranded RNA binding / protein binding / ribonuclease III                                                        | Validated            |
| miR162 | AT3G11240 | 8  | -24,8 | ATE2 (ARGININE-TRNA PROTEIN TRANSFERASE 2); arginyltransferase                                                                                                       | Not present          |
| miR162 | AT3G11560 | 6  | -25,8 | unknown protein                                                                                                                                                      | Not present          |
| miR162 | AT5G46840 | 6  | -22,4 | RNA recognition motif (RRM)-containing protein                                                                                                                       | Not present          |
| miR162 | AT1G51560 | 5  | -25,0 | FMN binding                                                                                                                                                          | Not present          |
| miR162 | AT1G71310 | 5  | -22,6 | unknown protein                                                                                                                                                      | Not present          |
| miR162 | AT3G25520 | 5  | -23,3 | ATL5 (A. THALIANA RIBOSOMAL PROTEIN L5); 5S rRNA binding / structural constituent of ribosome                                                                        | Not present          |
| miR162 | AT4G17090 | 5  | -20,6 | CT-BMY (CHLOROPLAST BETA-AMYLASE); beta-amylase                                                                                                                      | Not present          |
| miR162 | AT4G23160 | 5  | -23,1 | protein kinase family protein                                                                                                                                        | Not present          |
| miR162 | AT5G47870 | 5  | -24,8 | unknown protein                                                                                                                                                      | Not present          |
| miR162 | AT5G58230 | 5  | -24,7 | MS1 (MULTICOPY SUPPRESSOR OF IRA1); protein binding                                                                                                                  | Not present          |
| miR162 | AT1G63430 | 4  | -25,8 | leucine-rich repeat transmembrane protein kinase, putative                                                                                                           | Not present          |
| miR162 | AT2G25300 | 4  | -25,2 | transferase, transferring glycosyl groups / transferase, transferring hexosyl groups                                                                                 | Not present          |
| miR162 | AT2G40100 | 4  | -26,1 | LHCB4.3 (light harvesting complex PSII); chlorophyll binding                                                                                                         | Not present          |
| miR162 | AT4G02080 | 4  | -26,4 | ATSAR2 (ARABIDOPSIS THALIANA SECRETION-ASSOCIATED RAS SUPER FAMILY 2); GTP binding                                                                                   | Not present          |
| miR162 | AT5G01530 | 4  | -26,3 | chlorophyll A-B binding protein CP29 (LHCB4)                                                                                                                         | Not present          |
| miR162 | AT5G37710 | 4  | -23,9 | lipase class 3 family protein / calmodulin-binding heat-shock protein, putative                                                                                      | Not present          |
| miR162 | AT5G39740 | 4  | -25,3 | 60S ribosomal protein L5 (RPL5B)                                                                                                                                     | Not present          |
| miR164 | AT5G61430 | 24 | -36,5 | ANAC100 (ARABIDOPSIS NAC DOMAIN CONTAINING PROTEIN 100); transcription factor                                                                                        | Validated            |
| miR164 | AT1G56010 | 22 | -36,3 | NAC1; transcription factor                                                                                                                                           | Validated            |
| miR164 | AT3G62830 | 14 | -33,5 | AUD1; UDP-glucuronate decarboxylase/ catalytic/ dTDP-glucose 4,6-dehydratase                                                                                         | New potential target |
| miR164 | AT5G07680 | 10 | -36,8 | ANAC080 (ARABIDOPSIS NAC DOMAIN CONTAINING PROTEIN 80); transcription factor                                                                                         | Validated            |
| miR164 | AT2G28760 | 9  | -34,5 | NAD-dependent epimerase/dehydratase family protein                                                                                                                   | Not present          |
| miR164 | AT2G01080 | 8  | -31,1 |                                                                                                                                                                      | Not present          |
| miR164 | AT2G39940 | 8  | -29,2 | COI1 (CORONATINE INSENSITIVE 1);                                                                                                                                     | Not present          |

|        |           |   |       |                                                                                                                                                                                                                                                                                       |                      |
|--------|-----------|---|-------|---------------------------------------------------------------------------------------------------------------------------------------------------------------------------------------------------------------------------------------------------------------------------------------|----------------------|
| miR164 | AT4G34490 | 8 | -29,5 | protein binding / ubiquitin-protein ligase<br>ATCAP1 (ARABIDOPSIS THALIANA<br>CYCLASE ASSOCIATED PROTEIN 1);<br>actin binding                                                                                                                                                         | Not present          |
| miR164 | AT2G47650 | 7 | -34,3 | UXS4 (UDP-XYLOSE SYNTHASE 4);<br>UDP-glucuronate decarboxylase/<br>catalytic                                                                                                                                                                                                          | New potential target |
| miR164 | AT5G53950 | 7 | -37,5 | CUC2 (CUP-SHAPED COTYLEDON 2);<br>transcription factor                                                                                                                                                                                                                                | Validated            |
| miR164 | AT3G46440 | 7 | -35,4 | UXS5; UDP-glucuronate decarboxylase/<br>catalytic                                                                                                                                                                                                                                     | Not present          |
| miR164 | AT3G62580 | 7 | -27,7 |                                                                                                                                                                                                                                                                                       | Not present          |
| miR164 | AT3G18170 | 6 | -27,1 | transferase, transferring glycosyl groups                                                                                                                                                                                                                                             | Not present          |
| miR164 | AT1G01630 | 5 | -28,2 | SEC14 cytosolic factor, putative /<br>phosphoglyceride transfer protein,<br>putative                                                                                                                                                                                                  | Not present          |
| miR164 | AT1G05260 | 5 | -29,7 | RCI3 (RARE COLD INDUCIBLE GENE<br>3); peroxidase                                                                                                                                                                                                                                      | Not present          |
| miR164 | AT2G29630 | 5 | -30,4 | THIC (ThiaminC); ADP-ribose<br>pyrophosphohydrolase/ catalytic/ iron-<br>sulfur cluster binding                                                                                                                                                                                       | Not present          |
| miR164 | AT3G22142 | 5 | -27,4 | structural constituent of cell wall                                                                                                                                                                                                                                                   | Not present          |
| miR164 | AT3G52140 | 5 | -32,7 | tetratricopeptide repeat (TPR)-containing<br>protein                                                                                                                                                                                                                                  | Not present          |
| miR164 | AT3G53520 | 5 | -35,8 | UXS1 (UDP-GLUCURONIC ACID<br>DECARBOXYLASE 1); UDP-<br>glucuronate decarboxylase/ catalytic                                                                                                                                                                                           | Not present          |
| miR164 | AT5G25610 | 4 | -28,8 | RD22; nutrient reservoir                                                                                                                                                                                                                                                              | New potential target |
| miR164 | AT5G39610 | 4 | -34,8 | ATNAC6 (ARABIDOPSIS NAC DOMAIN<br>CONTAINING PROTEIN 6); protein<br>heterodimerization/ protein<br>homodimerization/ transcription factor                                                                                                                                             | Validated            |
| miR164 | AT1G04110 | 4 | -30,5 | SDD1 (STOMATAL DENSITY AND<br>DISTRIBUTION); serine-type<br>endopeptidase                                                                                                                                                                                                             | Not present          |
| miR164 | AT1G04240 | 4 | -29,6 | SHY2 (SHORT HYPOCOTYL 2);<br>transcription factor                                                                                                                                                                                                                                     | Not present          |
| miR164 | AT1G27480 | 4 | -28,0 | lecithin:cholesterol acyltransferase<br>family protein / LACT family protein                                                                                                                                                                                                          | Not present          |
| miR164 | AT1G52760 | 4 | -28,3 | esterase/lipase/thioesterase family<br>protein                                                                                                                                                                                                                                        | Not present          |
| miR164 | AT1G67410 | 4 | -31,6 | exostosin family protein                                                                                                                                                                                                                                                              | Not present          |
| miR164 | AT2G29570 | 4 | -30,0 | PCNA2 (PROLIFERATING CELL<br>NUCLEAR ANTIGEN 2); DNA binding /<br>DNA polymerase processivity factor                                                                                                                                                                                  | Not present          |
| miR164 | AT2G30530 | 4 | -26,0 | unknown protein                                                                                                                                                                                                                                                                       | Not present          |
| miR164 | AT3G13220 | 4 | -31,5 | ABC transporter family protein                                                                                                                                                                                                                                                        | Not present          |
| miR164 | AT3G16570 | 4 | -32,5 | RALFL23 (ralf-like 23); signal transducer                                                                                                                                                                                                                                             | Not present          |
| miR164 | AT3G18830 | 4 | -29,1 | ATPLT5 (POLYOL TRANSPORTER 5);<br>D-ribose transmembrane transporter/ D-<br>xylose transmembrane transporter/<br>carbohydrate transmembrane<br>transporter/ galactose transmembrane<br>transporter/ glucose transmembrane<br>transporter/ glycerol transmembrane<br>transporter/ mann | Not present          |
| miR164 | AT3G21770 | 4 | -29,8 | peroxidase 30 (PER30) (P30) (PRXR9)                                                                                                                                                                                                                                                   | Not present          |
| miR164 | AT3G44340 | 4 | -29,7 | CEF (clone eighty-four); protein binding /<br>transporter/ zinc ion binding                                                                                                                                                                                                           | Not present          |
| miR164 | AT3G44735 | 4 | -31,2 | PSK1; growth factor                                                                                                                                                                                                                                                                   | Not present          |

|        |           |    |       |                                                                                                                                                                                                                                                        |             |
|--------|-----------|----|-------|--------------------------------------------------------------------------------------------------------------------------------------------------------------------------------------------------------------------------------------------------------|-------------|
| miR164 | AT3G55646 | 4  | -31,5 | unknown protein                                                                                                                                                                                                                                        | Not present |
| miR164 | AT4G15800 | 4  | -31,8 | RALFL33 (ralf-like 33); signal transducer                                                                                                                                                                                                              | Not present |
| miR164 | AT4G19170 | 4  | -31,2 | NCED4 (NINE-CIS-EPOXYCAROTENOID DIOXYGENASE 4)                                                                                                                                                                                                         | Not present |
| miR164 | AT5G15410 | 4  | -31,8 | DND1 (DEFENSE NO DEATH 1); calcium channel/ calmodulin binding / cation channel/ cyclic nucleotide binding / intracellular cAMP activated cation channel/ intracellular cyclic nucleotide activated cation channel/ inward rectifier potassium channel | Not present |
| miR164 | AT5G43100 | 4  | -35,3 | aspartyl protease family protein                                                                                                                                                                                                                       | Not present |
| miR166 | AT5G60690 | 20 | -38,4 | REV (REVOLUTA); DNA binding / lipid binding / transcription factor                                                                                                                                                                                     | Validated   |
| miR166 | AT2G34710 | 17 | -38,7 | PHB (PHABULOSA); DNA binding / transcription factor                                                                                                                                                                                                    | Validated   |
| miR166 | AT1G52150 | 14 | -38,8 | ATHB-15; DNA binding / transcription factor                                                                                                                                                                                                            | Validated   |
| miR166 | AT4G32880 | 9  | -38,8 | ATHB-8 (HOMEBOX GENE 8); DNA binding / transcription factor                                                                                                                                                                                            | Validated   |
| miR166 | AT1G42440 | 9  | -32,2 |                                                                                                                                                                                                                                                        | Not present |
| miR166 | AT1G30490 | 7  | -39,3 | PHV (PHAVOLUTA); DNA binding / protein binding / transcription factor                                                                                                                                                                                  | Validated   |
| miR166 | AT1G49760 | 6  | -32,6 | PAB8 (POLY(A) BINDING PROTEIN 8); RNA binding / translation initiation factor                                                                                                                                                                          | Not present |
| miR166 | AT4G34110 | 6  | -32,4 | PAB2 (POLY(A) BINDING 2); RNA binding / translation initiation factor                                                                                                                                                                                  | Not present |
| miR166 | AT3G13750 | 5  | -29,1 | BGAL1 (Beta galactosidase 1); beta-galactosidase/ catalytic/ cation binding / heme binding / peroxidase/ sugar binding                                                                                                                                 | Not present |
| miR166 | AT3G24090 | 5  | -26,4 | glutamine-fructose-6-phosphate transaminase (isomerizing)/ sugar binding / transaminase                                                                                                                                                                | Not present |
| miR166 | AT4G17650 | 5  | -30,6 | aromatic-rich family protein                                                                                                                                                                                                                           | Not present |
| miR166 | AT3G02230 | 4  | -24,7 | RGP1 (REVERSIBLY GLYCOSYLATED POLYPEPTIDE 1); cellulose synthase (UDP-forming)                                                                                                                                                                         | Not present |
| miR166 | AT3G12390 | 4  | -30,4 | nascent polypeptide associated complex alpha chain protein, putative / alpha-NAC, putative                                                                                                                                                             | Not present |
| miR166 | AT4G20330 | 4  | -27,1 | transcription initiation factor-related                                                                                                                                                                                                                | Not present |
| miR166 | AT4G34200 | 4  | -28,1 | EDA9 (embryo sac development arrest 9); ATP binding                                                                                                                                                                                                    | Not present |
| miR166 | AT5G52380 | 4  | -32,4 | zinc knuckle (CCHC-type) family protein                                                                                                                                                                                                                | Not present |
| miR167 | AT1G30330 | 32 | -32,8 | ARF6 (AUXIN RESPONSE FACTOR 6); transcription factor                                                                                                                                                                                                   | Validated   |
| miR167 | AT5G37020 | 27 | -32,9 | ARF8 (AUXIN RESPONSE FACTOR 8); transcription factor                                                                                                                                                                                                   | Validated   |
| miR167 | AT5G11800 | 8  | -27,7 | KEA6; potassium ion transmembrane transporter/ potassium:hydrogen antiporter                                                                                                                                                                           | Not present |
| miR167 | AT4G30210 | 6  | -18,5 | ATR2 (ARABIDOPSIS P450 REDUCTASE 2); NADPH-hemoprotein reductase                                                                                                                                                                                       | Not present |
| miR167 | AT2G02760 | 5  | -27,9 | ATUBC2 (UBIQUITING-CONJUGATING ENZYME 2); ubiquitin-protein ligase                                                                                                                                                                                     | Not present |
| miR167 | AT2G15240 | 5  | -29,2 | UNC-50 family protein                                                                                                                                                                                                                                  | Not present |
| miR167 | AT2G17880 | 5  | -29,9 | DNAJ heat shock protein, putative                                                                                                                                                                                                                      | Not present |

|        |           |    |       |                                                                                                                                                                                                                                                                |                      |
|--------|-----------|----|-------|----------------------------------------------------------------------------------------------------------------------------------------------------------------------------------------------------------------------------------------------------------------|----------------------|
| miR167 | AT3G02420 | 5  | -22,3 | unknown protein                                                                                                                                                                                                                                                | Not present          |
| miR167 | AT3G52500 | 5  | -25,8 | aspartyl protease family protein                                                                                                                                                                                                                               | Not present          |
| miR167 | AT5G23860 | 5  | -25,2 | TUB8; structural constituent of cytoskeleton                                                                                                                                                                                                                   | Not present          |
| miR167 | AT5G05140 | 4  | -29,5 | transcription elongation factor-related ATRFNR2 (ROOT FNR 2); FAD binding / NADP or NADPH binding / electron carrier/ ferredoxin-NADP+ reductase/ oxidoreductase                                                                                               | New potential target |
| miR167 | AT1G30510 | 4  | -23,4 | unknown protein                                                                                                                                                                                                                                                | Not present          |
| miR167 | AT1G32120 | 4  | -25,5 | PLDALPHA2 (phospholipase d alpha 2); phospholipase D                                                                                                                                                                                                           | Not present          |
| miR167 | AT1G52570 | 4  | -24,7 | VHA-A (VACUOLAR ATP SYNTHASE SUBUNIT A); ATP binding / hydrogen ion transporting ATP synthase, rotational mechanism / hydrolase, acting on acid anhydrides, catalyzing transmembrane movement of substances / proton-transporting ATPase, rotational mechanism | Not present          |
| miR167 | AT1G78900 | 4  | -20,7 | unknown protein                                                                                                                                                                                                                                                | Not present          |
| miR167 | AT2G21960 | 4  | -27,7 | unknown protein                                                                                                                                                                                                                                                | Not present          |
| miR167 | AT3G10690 | 4  | -24,2 | DNA gyrase subunit A family protein                                                                                                                                                                                                                            | Not present          |
| miR167 | AT3G10910 | 4  | -24,7 | zinc finger (C3HC4-type RING finger) family protein                                                                                                                                                                                                            | Not present          |
| miR167 | AT3G15730 | 4  | -25,9 | PLDALPHA1 (PHOSPHOLIPASE D ALPHA 1); phospholipase D                                                                                                                                                                                                           | Not present          |
| miR167 | AT3G24430 | 4  | -28,2 | HCF101 (HIGH-CHLOROPHYLL-FLUORESCENCE 101); ATP binding                                                                                                                                                                                                        | Not present          |
| miR167 | AT4G31410 | 4  | -29,1 | unknown protein                                                                                                                                                                                                                                                | Not present          |
| miR167 | AT5G65470 | 4  | -31,4 | unknown protein                                                                                                                                                                                                                                                | Not present          |
| miR168 | AT1G48410 | 26 | -37,2 | AGO1 (ARGONAUTE 1); endoribonuclease/ miRNA binding / protein binding / siRNA binding                                                                                                                                                                          | Validated            |
| miR168 | AT3G06680 | 5  | -27,0 | 60S ribosomal protein L29 (RPL29B)                                                                                                                                                                                                                             | Not present          |
| miR168 | AT1G65980 | 4  | -31,5 | TPX1 (thioredoxin-dependent peroxidase 1); antioxidant/ oxidoreductase                                                                                                                                                                                         | Not present          |
| miR168 | AT5G09760 | 4  | -33,3 | pectinesterase family protein                                                                                                                                                                                                                                  | Not present          |
| miR168 | AT5G13160 | 4  | -34,4 | PBS1 (avrPphB susceptible 1); kinase/ protein serine/threonine kinase                                                                                                                                                                                          | Not present          |
| miR168 | AT5G43310 | 4  | -35,2 | COP1-interacting protein-related                                                                                                                                                                                                                               | Not present          |
| miR169 | AT1G72830 | 20 | -33,6 | NF-YA3 (NUCLEAR FACTOR Y, SUBUNIT A3); transcription factor                                                                                                                                                                                                    | Validated            |
| miR169 | AT3G20910 | 18 | -30,2 | NF-YA9 (NUCLEAR FACTOR Y, SUBUNIT A9); specific transcriptional repressor/ transcription factor                                                                                                                                                                | Validated            |
| miR169 | AT5G12840 | 17 | -30,1 | NF-YA1 (NUCLEAR FACTOR Y, SUBUNIT A1); transcription factor                                                                                                                                                                                                    | Validated            |
| miR169 | AT1G54160 | 13 | -32,5 | NF-YA5 (NUCLEAR FACTOR Y, SUBUNIT A5); specific transcriptional repressor/ transcription factor                                                                                                                                                                | Validated            |
| miR169 | AT5G06510 | 11 | -31,1 | NF-YA10 (NUCLEAR FACTOR Y, SUBUNIT A10); transcription factor                                                                                                                                                                                                  | Validated            |
| miR169 | AT3G17860 | 11 | -27,4 | JAZ3 (JASMONATE-ZIM-DOMAIN PROTEIN 3)                                                                                                                                                                                                                          | Not present          |
| miR169 | AT1G17590 | 9  | -33,3 | NF-YA8 (NUCLEAR FACTOR Y, SUBUNIT A8); transcription factor                                                                                                                                                                                                    | Validated            |
| miR169 | AT3G05690 | 9  | -32,7 | NF-YA2 (NUCLEAR FACTOR Y, SUBUNIT A2); transcription factor                                                                                                                                                                                                    | Validated            |
| miR169 | AT1G17370 | 9  | -27,9 | UBP1B (oligouridylate binding protein)                                                                                                                                                                                                                         | Not present          |

|        |           |    |       |                                                                                                                                                                |                      |
|--------|-----------|----|-------|----------------------------------------------------------------------------------------------------------------------------------------------------------------|----------------------|
| miR169 | AT3G54480 | 9  | -26,3 | 1B); mRNA 3'-UTR binding<br>SKIP5 (SKP1/ASK-INTERACTING PROTEIN 5)                                                                                             | Not present          |
| miR169 | AT4G28880 | 8  | -30,2 | ckl3 (Casein Kinase I-like 3); ATP binding / kinase/ protein kinase/ protein serine/threonine kinase                                                           | Not present          |
| miR169 | AT5G47040 | 8  | -26,2 | LON2 (LON PROTEASE 2); ATP binding / ATP-dependent peptidase/ nucleoside-triphosphatase/ nucleotide binding / serine-type endopeptidase/ serine-type peptidase | Not present          |
| miR169 | AT1G23740 | 7  | -24,0 | oxidoreductase, zinc-binding dehydrogenase family protein                                                                                                      | Not present          |
| miR169 | AT1G30500 | 7  | -30,3 | NF-YA7 (NUCLEAR FACTOR Y, SUBUNIT A7); specific transcriptional repressor/ transcription factor                                                                | Not present          |
| miR169 | AT2G27600 | 7  | -26,7 | SKD1 (SUPPRESSOR OF K+ TRANSPORT GROWTH DEFECT1); ATP binding / nucleoside-triphosphatase/ nucleotide binding                                                  | Not present          |
| miR169 | AT3G14020 | 7  | -32,6 | NF-YA6 (NUCLEAR FACTOR Y, SUBUNIT A6); transcription factor                                                                                                    | Not present          |
| miR169 | AT1G80770 | 6  | -29,2 | PDE318 (pigment defective 318); GTP binding                                                                                                                    | New potential target |
| miR169 | AT1G53570 | 6  | -29,7 | MAP3KA; ATP binding / kinase/ protein kinase/ protein serine/threonine kinase                                                                                  | Not present          |
| miR169 | AT1G77940 | 6  | -27,0 | 60S ribosomal protein L30 (RPL30B)                                                                                                                             | Not present          |
| miR169 | AT3G14470 | 6  | -26,1 | disease resistance protein (NBS-LRR class), putative                                                                                                           | Not present          |
| miR169 | AT2G44830 | 5  | -27,8 | protein kinase, putative                                                                                                                                       | Not present          |
| miR169 | AT5G40670 | 5  | -28,3 | PQ-loop repeat family protein / transmembrane family protein                                                                                                   | Not present          |
| miR169 | AT1G02130 | 4  | -25,2 | ARA-5 (ARABIDOPSIS RAS 5); GTP binding                                                                                                                         | Not present          |
| miR169 | AT1G50430 | 4  | -26,8 | DWF5 (DWARF 5); sterol delta7 reductase                                                                                                                        | Not present          |
| miR169 | AT4G23160 | 4  | -26,8 | protein kinase family protein                                                                                                                                  | Not present          |
| miR169 | AT5G62360 | 4  | -24,4 | invertase/pectin methylesterase inhibitor family protein                                                                                                       | Not present          |
| miR171 | AT4G00150 | 28 | -35,9 | scarecrow-like transcription factor 6 (SCL6)                                                                                                                   | Validated            |
| miR171 | AT4G36710 | 14 | -27,6 | transcription factor                                                                                                                                           | Not present          |
| miR171 | AT4G08250 | 8  | -29,5 | scarecrow transcription factor family protein                                                                                                                  | Not present          |
| miR171 | AT1G69420 | 5  | -26,5 | zinc finger (DHC type) family protein                                                                                                                          | Not present          |
| miR171 | AT1G14390 | 4  | -26,5 | leucine-rich repeat transmembrane protein kinase, putative                                                                                                     | Not present          |
| miR171 | AT2G19860 | 4  | -27,3 | HXK2 (HEXOKINASE 2); ATP binding / fructokinase/ glucokinase/ hexokinase                                                                                       | Not present          |
| miR171 | AT4G16760 | 4  | -26,9 | ACX1 (ACYL-COA OXIDASE 1); acyl-CoA oxidase                                                                                                                    | Not present          |
| miR172 | AT4G36920 | 33 | -33,2 | AP2 (APETALA 2); transcription factor                                                                                                                          | Validated            |
| miR172 | AT2G28550 | 25 | -33,6 | RAP2.7 (RELATED TO AP2.7); DNA binding / transcription factor                                                                                                  | Validated            |
| miR172 | AT3G25800 | 21 | -22,7 | PP2AA2 (PROTEIN PHOSPHATASE 2A SUBUNIT A2); protein phosphatase type 2A regulator                                                                              | Not present          |
| miR172 | AT4G27720 | 10 | -21,8 |                                                                                                                                                                | New potential target |
| miR172 | AT2G42280 | 9  | -26,1 | basic helix-loop-helix (bHLH) family protein                                                                                                                   | Not present          |



|        |           |    |       |                                                                                                                                            |             |
|--------|-----------|----|-------|--------------------------------------------------------------------------------------------------------------------------------------------|-------------|
| miR172 | AT5G67380 | 8  | -23,0 | CKA1 (CASEIN KINASE ALPHA 1); kinase                                                                                                       | Not present |
| miR172 | AT1G07900 | 7  | -21,9 | LBD1 (LOB DOMAIN-CONTAINING PROTEIN 1)                                                                                                     | Not present |
| miR172 | AT1G73720 | 6  | -27,5 | transducin family protein / WD-40 repeat family protein                                                                                    | Not present |
| miR172 | AT2G37150 | 6  | -27,6 | zinc finger (C3HC4-type RING finger) family protein                                                                                        | Not present |
| miR172 | AT5G07020 | 6  | -22,1 | proline-rich family protein                                                                                                                | Not present |
| miR172 | AT5G60120 | 5  | -33,8 | TOE2; DNA binding / transcription factor                                                                                                   | Validated   |
| miR172 | AT1G69830 | 5  | -25,9 | AMY3 (ALPHA-AMYLASE-LIKE 3); alpha-amylase                                                                                                 | Not present |
| miR172 | AT1G77930 | 5  | -23,3 | DNAJ heat shock N-terminal domain-containing protein                                                                                       | Not present |
| miR172 | AT2G47940 | 5  | -23,4 | DEGP2; serine-type endopeptidase/serine-type peptidase                                                                                     | Not present |
| miR172 | AT3G15030 | 5  | -25,0 | TCP4 (TCP family transcription factor 4); transcription factor                                                                             | Not present |
| miR172 | AT4G36960 | 5  | -24,6 | RNA recognition motif (RRM)-containing protein                                                                                             | Not present |
| miR172 | AT1G17680 | 4  | -26,0 | transcription factor-related                                                                                                               | Not present |
| miR172 | AT2G06520 | 4  | -22,7 | PSBX (photosystem II subunit X)                                                                                                            | Not present |
| miR172 | AT2G20420 | 4  | -29,6 | succinyl-CoA ligase (GDP-forming) beta-chain, mitochondrial, putative / succinyl-CoA synthetase, beta chain, putative / SCS-beta, putative | Not present |
| miR172 | AT2G22360 | 4  | -23,4 | DNAJ heat shock family protein                                                                                                             | Not present |
| miR172 | AT2G30350 | 4  | -24,6 | endo/excinuclease amino terminal domain-containing protein                                                                                 | Not present |
| miR172 | AT2G30950 | 4  | -25,5 | VAR2 (VARIEGATED 2); ATP-dependent peptidase/ ATPase/ metallopeptidase/ zinc ion binding                                                   | Not present |
| miR172 | AT2G45200 | 4  | -24,1 | GOS12 (GOLGI SNARE 12); SNARE binding                                                                                                      | Not present |
| miR172 | AT2G45260 | 4  | -29,1 | unknown protein                                                                                                                            | Not present |
| miR172 | AT3G05545 | 4  | -22,3 | transcription factor, putative / zinc finger (C3HC4 type RING finger) family protein                                                       | Not present |
| miR172 | AT3G09720 | 4  | -26,8 | DEAD/DEAH box helicase, putative                                                                                                           | Not present |
| miR172 | AT3G13300 | 4  | -23,6 | VCS (VARICOSE); nucleotide binding / protein homodimerization                                                                              | Not present |
| miR172 | AT4G03110 | 4  | -22,7 | RNA-binding protein, putative                                                                                                              | Not present |
| miR172 | AT4G26540 | 4  | -23,2 | kinase                                                                                                                                     | Not present |
| miR172 | AT4G27300 | 4  | -21,4 | S-locus protein kinase, putative                                                                                                           | Not present |
| miR172 | AT4G36910 | 4  | -27,7 | LEJ2 (LOSS OF THE TIMING OF ET AND JA BIOSYNTHESIS 2)                                                                                      | Not present |
| miR172 | AT5G13010 | 4  | -20,3 | EMB3011 (embryo defective 3011); ATP binding / RNA helicase/ helicase/ nucleic acid binding                                                | Not present |
| miR172 | AT5G16760 | 4  | -25,4 | inositol 1,3,4-trisphosphate 5/6-kinase                                                                                                    | Not present |
| miR172 | AT5G42390 | 4  | -23,8 | metalloendopeptidase                                                                                                                       | Not present |
| miR319 | AT3G15030 | 25 | -32,9 | TCP4 (TCP family transcription factor 4); transcription factor                                                                             | Validated   |
| miR319 | AT4G18390 | 22 | -34,8 | TCP family transcription factor, putative                                                                                                  | Validated   |
| miR319 | AT5G06100 | 11 | -34,2 | MYB33 (MYB DOMAIN PROTEIN 33); DNA binding / transcription factor                                                                          | Validated   |
| miR319 | AT1G53230 | 8  | -32,7 | TCP3; transcription factor                                                                                                                 | Validated   |
| miR319 | AT3G11440 | 8  | -34,9 | MYB65 (MYB DOMAIN PROTEIN 65); DNA binding / transcription factor                                                                          | Validated   |
| miR319 | AT5G04420 | 7  | -27,1 | kelch repeat-containing protein                                                                                                            | Not present |

|        |           |    |       |                                                                                                                                                   |                      |
|--------|-----------|----|-------|---------------------------------------------------------------------------------------------------------------------------------------------------|----------------------|
| miR319 | AT1G30210 | 6  | -33,5 | TCP24 (TEOSINTE BRANCHED1, CYCLOIDEA, AND PCF FAMILY 24); transcription factor                                                                    | Validated            |
| miR319 | AT2G36530 | 6  | -32,7 | LOS2; copper ion binding / phosphopyruvate hydratase                                                                                              | Not present          |
| miR319 | AT4G23160 | 6  | -32,2 | protein kinase family protein                                                                                                                     | Not present          |
| miR319 | AT3G60460 | 4  | -28,7 | DUO1 (DUO POLLEN 1); DNA binding / transcription factor                                                                                           | Validated            |
| miR319 | AT1G13950 | 4  | -28,1 | ELF5A-1 (EUKARYOTIC ELONGATION FACTOR 5A-1); translation initiation factor                                                                        | Not present          |
| miR319 | AT1G54610 | 4  | -28,5 | protein kinase family protein                                                                                                                     | Not present          |
| miR319 | AT2G05830 | 4  | -29,3 | eukaryotic translation initiation factor 2B family protein / eIF-2B family protein                                                                | Not present          |
| miR319 | AT3G07310 | 4  | -30,4 | unknown protein                                                                                                                                   | Not present          |
| miR319 | AT3G07565 | 4  | -36,6 | DNA binding                                                                                                                                       | Not present          |
| miR319 | AT4G33010 | 4  | -29,6 | AtGLDP1 (Arabidopsis thaliana glycine decarboxylase P-protein 1); catalytic/ glycine dehydrogenase (decarboxylating)/ pyridoxal phosphate binding | Not present          |
| miR319 | AT4G34260 | 4  | -29,1 | FUC95A; 1,2-alpha-L-fucosidase                                                                                                                    | Not present          |
| miR319 | AT5G62000 | 4  | -30,7 | ARF2 (AUXIN RESPONSE FACTOR 2); protein binding / transcription factor                                                                            | Not present          |
| miR390 | AT3G25230 | 11 | -29,2 | ROF1 (ROTAMASE FKBP 1); FK506 binding / calmodulin binding / peptidyl-prolyl cis-trans isomerase                                                  | Not present          |
| miR390 | AT5G48570 | 7  | -28,6 | peptidyl-prolyl cis-trans isomerase, putative / FK506-binding protein, putative                                                                   | New potential target |
| miR390 | AT1G63430 | 5  | -34,7 | leucine-rich repeat transmembrane protein kinase, putative                                                                                        | Not present          |
| miR390 | AT2G33730 | 5  | -32,8 | DEAD box RNA helicase, putative                                                                                                                   | Not present          |
| miR390 | AT2G36350 | 4  | -27,7 | protein kinase, putative                                                                                                                          | New potential target |
| miR390 | AT1G47380 | 4  | -30,1 | protein phosphatase 2C-related / PP2C-related                                                                                                     | Not present          |
| miR390 | AT2G30950 | 4  | -33,8 | VAR2 (VARIEGATED 2); ATP-dependent peptidase/ ATPase/ metalloproteinase/ zinc ion binding                                                         | Not present          |
| miR390 | AT5G47750 | 4  | -29,8 | D6PKL2 (D6 PROTEIN KINASE LIKE 2); kinase                                                                                                         | Not present          |
| miR393 | AT3G62980 | 30 | -33,3 | TIR1 (TRANSPORT INHIBITOR RESPONSE 1); auxin binding / protein binding / ubiquitin-protein ligase                                                 | Validated            |
| miR393 | AT3G26810 | 23 | -34,1 | AFB2 (AUXIN SIGNALING F-BOX 2); auxin binding / ubiquitin-protein ligase                                                                          | Validated            |
| miR393 | AT1G12820 | 18 | -33,7 | AFB3 (AUXIN SIGNALING F-BOX 3); auxin binding / ubiquitin-protein ligase                                                                          | Validated            |
| miR393 | AT4G35630 | 10 | -24,8 | PSAT; O-phospho-L-serine:2-oxoglutarate aminotransferase                                                                                          | New potential target |
| miR393 | AT2G07690 | 8  | -28,0 | minichromosome maintenance family protein / MCM family protein                                                                                    | Not present          |
| miR393 | AT3G50845 | 8  | -26,5 |                                                                                                                                                   | Not present          |
| miR393 | AT1G16740 | 7  | -29,2 | ribosomal protein L20 family protein                                                                                                              | Not present          |
| miR393 | AT2G17630 | 5  | -25,8 | phosphoserine aminotransferase, putative                                                                                                          | New potential target |
| miR393 | AT1G53210 | 5  | -23,4 | sodium/calcium exchanger family protein / calcium-binding EF hand family protein                                                                  | Not present          |
| miR393 | AT3G51860 | 5  | -21,6 | CAX3 (CATION EXCHANGER 3); calcium:cation antiporter/                                                                                             | Not present          |

|        |           |    |       |                                                                                                                                                            |                          |
|--------|-----------|----|-------|------------------------------------------------------------------------------------------------------------------------------------------------------------|--------------------------|
| miR393 | AT4G03190 | 4  | -29,7 | calcium:hydrogen antiporter/<br>cation:cation antiporter<br>GRH1 (GRR1-LIKE PROTEIN 1); auxin<br>binding / protein binding / ubiquitin-<br>protein ligase  | New potential target     |
| miR393 | AT1G47240 | 4  | -22,3 | NRAMP2; inorganic anion<br>transmembrane transporter/ metal ion<br>transmembrane transporter                                                               | Not present              |
| miR393 | AT5G48560 | 4  | -29,7 | basic helix-loop-helix (bHLH) family<br>protein                                                                                                            | Not present <sup>1</sup> |
| miR393 | AT5G52640 | 4  | -25,6 | ATHSP90.1 (HEAT SHOCK PROTEIN<br>90.1); ATP binding / unfolded protein<br>binding                                                                          | Not present              |
| miR394 | AT1G27340 | 28 | -35,4 | F-box family protein                                                                                                                                       | Validated                |
| miR394 | AT5G64550 | 12 | -30,4 | loricrin-related                                                                                                                                           | New potential target     |
| miR394 | AT4G16780 | 8  | -23,1 | ATHB-2 (ARABIDOPSIS THALIANA<br>HOMEBOX PROTEIN 2); DNA binding<br>/ protein homodimerization/ sequence-<br>specific DNA binding / transcription<br>factor | Not present              |
| miR394 | AT4G33430 | 8  | -30,5 | BAK1 (BRI1-ASSOCIATED RECEPTOR<br>KINASE); kinase/ protein binding /<br>protein heterodimerization/ protein<br>serine/threonine kinase                     | Not present              |
| miR394 | AT1G75660 | 7  | -27,2 | XRN3; 5"-3" exoribonuclease                                                                                                                                | Not present              |
| miR394 | AT2G46280 | 6  | -33,0 | TRIP-1 (TGF-BETA RECEPTOR<br>INTERACTING PROTEIN 1); nucleotide<br>binding / protein binding                                                               | Not present              |
| miR394 | AT3G06483 | 6  | -28,6 | PDK (PYRUVATE DEHYDROGENASE<br>KINASE); ATP binding / histidine<br>phosphotransfer kinase/ pyruvate<br>dehydrogenase (acetyl-transferring)<br>kinase       | Not present              |
| miR394 | AT5G45140 | 6  | -27,5 | NRPC2; DNA binding / DNA-directed<br>RNA polymerase/ ribonucleoside binding                                                                                | Not present              |
| miR394 | AT5G64030 | 6  | -25,1 | dehydration-responsive protein-related                                                                                                                     | Not present              |
| miR394 | AT2G27110 | 5  | -28,4 | FRS3 (FAR1-related sequence 3); zinc<br>ion binding                                                                                                        | New potential target     |
| miR394 | AT1G64760 | 5  | -27,9 | glycosyl hydrolase family 17 protein                                                                                                                       | Not present              |
| miR394 | AT3G01280 | 5  | -28,6 | VDAC1 (VOLTAGE DEPENDENT<br>ANION CHANNEL 1); voltage-gated<br>anion channel                                                                               | Not present              |
| miR394 | AT4G02480 | 5  | -31,6 | AAA-type ATPase family protein                                                                                                                             | Not present              |
| miR394 | AT4G02930 | 5  | -24,5 | elongation factor Tu, putative / EF-Tu,<br>putative                                                                                                        | Not present              |
| miR394 | AT4G30310 | 5  | -33,8 | ribitol kinase, putative                                                                                                                                   | Not present              |
| miR394 | AT5G10290 | 5  | -27,6 | leucine-rich repeat family protein /<br>protein kinase family protein                                                                                      | Not present              |
| miR394 | AT5G52060 | 5  | -23,1 | ATBAG1 (ARABIDOPSIS THALIANA<br>BCL-2-ASSOCIATED ATHANOGENE<br>1); protein binding                                                                         | Not present              |
| miR394 | AT5G52640 | 5  | -24,0 | ATHSP90.1 (HEAT SHOCK PROTEIN<br>90.1); ATP binding / unfolded protein<br>binding                                                                          | Not present              |
| miR394 | AT5G09670 | 4  | -30,7 | loricrin-related                                                                                                                                           | New potential target     |
| miR394 | AT1G04400 | 4  | -24,7 | CRY2 (CRYPTOCHROME 2); blue light<br>photoreceptor/ protein homodimerization                                                                               | Not present              |
| miR394 | AT1G60900 | 4  | -26,0 | U2 snRNP auxiliary factor large subunit,<br>putative                                                                                                       | Not present              |
| miR394 | AT2G23390 | 4  | -30,5 |                                                                                                                                                            | Not present              |

|        |           |    |       |                                                                                                                                                |                                 |
|--------|-----------|----|-------|------------------------------------------------------------------------------------------------------------------------------------------------|---------------------------------|
| miR394 | AT2G34590 | 4  | -23,2 | transketolase family protein                                                                                                                   | Not present                     |
| miR394 | AT2G39420 | 4  | -28,5 | esterase/lipase/thioesterase family protein                                                                                                    | Not present                     |
| miR394 | AT3G26580 | 4  | -22,4 |                                                                                                                                                | Not present                     |
| miR394 | AT5G22300 | 4  | -31,2 | NIT4 (NITRILASE 4); 3-cyanoalanine hydratase/ cyanoalanine nitrilase/ indole-3-acetonitrile nitrilase/ nitrilase/ nitrile hydratase            | Not present                     |
| miR395 | AT3G22890 | 32 | -30,0 | APS1 (ATP SULFURYLASE 1); sulfate adenyltransferase (ATP)                                                                                      | Validated                       |
| miR395 | AT4G14680 | 19 | -30,9 | APS3; sulfate adenyltransferase (ATP)                                                                                                          | Validated                       |
| miR395 | AT1G10290 | 14 | -26,8 | ADL6 (DYNAMIN-LIKE PROTEIN 6); GTPase                                                                                                          | Not present                     |
| miR395 | AT5G10180 | 11 | -31,7 | AST68; sulfate transmembrane transporter                                                                                                       | Validated                       |
| miR395 | AT1G77990 | 9  | -29,5 | AST56; sulfate transmembrane transporter                                                                                                       | Not present                     |
| miR395 | AT5G43780 | 7  | -32,9 | APS4; sulfate adenyltransferase (ATP)                                                                                                          | Validated                       |
| miR395 | AT1G10390 | 5  | -26,2 | nucleoporin family protein                                                                                                                     | Not present                     |
| miR395 | AT2G28100 | 4  | -28,2 | ATFUC1 (alpha-L-fucosidase 1); alpha-L-fucosidase                                                                                              | Not present                     |
| miR395 | AT2G37250 | 4  | -24,6 | ADK (ADENOSINE KINASE); adenylate kinase/ nucleotide kinase                                                                                    | Not present                     |
| miR395 | AT5G05580 | 4  | -29,0 | FAD8 (FATTY ACID DESATURASE 8); omega-3 fatty acid desaturase                                                                                  | Not present                     |
| miR395 | AT5G66880 | 4  | -26,1 | SNRK2.3 (SUCROSE NONFERMENTING 1(SNF1)-RELATED PROTEIN KINASE 2.3); kinase/ protein kinase                                                     | Not present                     |
| miR396 | AT2G22540 | 29 | -25,1 | SVP (SHORT VEGETATIVE PHASE); transcription factor/ translation repressor, nucleic acid binding                                                | New potential target            |
| miR396 | AT3G13960 | 27 | -30,5 | AtGRF5 (GROWTH-REGULATING FACTOR 5); transcription activator                                                                                   | Not present                     |
| miR396 | AT2G36400 | 24 | -30,2 | AtGRF3 (GROWTH-REGULATING FACTOR 3); transcription activator                                                                                   | Validated                       |
| miR396 | AT2G22840 | 23 | -30,6 | AtGRF1 (GROWTH-REGULATING FACTOR 1); transcription activator                                                                                   | Validated                       |
| miR396 | AT4G37740 | 21 | -30,7 | AtGRF2 (GROWTHREGULATING FACTOR 2); transcription activator                                                                                    | Validated                       |
| miR396 | AT1G71350 | 19 | -24,2 | eukaryotic translation initiation factor SUI1 family protein                                                                                   | New potential target            |
| miR396 | AT5G43060 | 14 | -30,3 | cysteine proteinase, putative / thiol protease, putative                                                                                       | New potential target: validated |
| miR396 | AT3G52910 | 12 | -30,3 | AtGRF4 (GROWTH-REGULATING FACTOR 4); transcription activator                                                                                   | Validated                       |
| miR396 | AT2G31880 | 9  | -24,7 | leucine-rich repeat transmembrane protein kinase, putative                                                                                     | New potential target            |
| miR396 | AT5G53660 | 9  | -30,7 | AtGRF7 (GROWTH-REGULATING FACTOR 7); transcription activator                                                                                   | Validated                       |
| miR396 | AT1G06950 | 9  | -20,1 | TIC110 (TRANSLOCON AT THE INNER ENVELOPE MEMBRANE OF CHLOROPLASTS 110)                                                                         | Not present                     |
| miR396 | AT1G12000 | 9  | -21,9 | pyrophosphate--fructose-6-phosphate 1-phosphotransferase beta subunit, putative / pyrophosphate-dependent 6-phosphofructose-1-kinase, putative | Not present                     |
| miR396 | AT1G47128 | 9  | -30,2 | RD21 (responsive to dehydration 21); cysteine-type endopeptidase/ cysteine-type peptidase                                                      | Not present                     |
| miR396 | AT5G22580 | 9  | -27,2 |                                                                                                                                                | Not present                     |

|        |           |   |       |                                                                                                                                                       |                                 |
|--------|-----------|---|-------|-------------------------------------------------------------------------------------------------------------------------------------------------------|---------------------------------|
| miR396 | AT5G56030 | 9 | -29,7 | HSP81-2 (HEAT SHOCK PROTEIN 81-2); ATP binding                                                                                                        | Not present                     |
| miR396 | AT1G04950 | 8 | -29,2 | TAF6 (TBP-ASSOCIATED FACTOR 6); DNA binding / RNA polymerase II transcription factor/ transcription initiation factor                                 | Not present                     |
| miR396 | AT3G48000 | 8 | -21,9 | ALDH2B4 (ALDEHYDE DEHYDROGENASE 2B4); 3-chloroallyl aldehyde dehydrogenase/ ATP binding / aldehyde dehydrogenase (NAD)                                | Not present                     |
| miR396 | AT3G59040 | 8 | -24,0 | pentatricopeptide (PPR) repeat-containing protein                                                                                                     | Not present                     |
| miR396 | AT2G45480 | 7 | -28,3 | AtGRF9 (GROWTH-REGULATING FACTOR 9); transcription activator                                                                                          | Validated                       |
| miR396 | AT3G14110 | 7 | -24,4 | FLU (FLUORESCENT IN BLUE LIGHT); binding                                                                                                              | New potential target: validated |
| miR396 | AT4G24150 | 7 | -29,5 | AtGRF8 (GROWTH-REGULATING FACTOR 8); transcription activator                                                                                          | Validated                       |
| miR396 | AT2G12550 | 7 | -28,7 | ubiquitin-associated (UBA)/TS-N domain-containing protein                                                                                             | Not present                     |
| miR396 | AT3G10220 | 7 | -22,5 | tubulin folding cofactor B                                                                                                                            | Not present                     |
| miR396 | AT3G43190 | 7 | -26,5 | SUS4; UDP-glycosyltransferase/ sucrose synthase/ transferase, transferring glycosyl groups                                                            | Not present                     |
| miR396 | AT3G52120 | 7 | -19,3 | SWAP (Suppressor-of-White-APricot)/surp domain-containing protein / D111/G-patch domain-containing protein                                            | Not present                     |
| miR396 | AT5G13700 | 7 | -25,4 | ATPAO1 (ARABIDOPSIS THALIANA POLYAMINE OXIDASE 1); FAD binding / polyamine oxidase                                                                    | Not present                     |
| miR396 | AT5G52640 | 7 | -27,1 | ATHSP90.1 (HEAT SHOCK PROTEIN 90.1); ATP binding / unfolded protein binding                                                                           | Not present                     |
| miR396 | AT5G56000 | 7 | -29,5 | heat shock protein 81-4 (HSP81-4)                                                                                                                     | Not present                     |
| miR396 | AT5G65700 | 7 | -24,8 | BAM1 (BARELY ANY MERISTEM 1); ATP binding / kinase/ protein serine/threonine kinase                                                                   | Not present                     |
| miR396 | AT1G23220 | 6 | -25,1 | dynein light chain type 1 family protein                                                                                                              | Not present                     |
| miR396 | AT1G59640 | 6 | -25,9 | ZCW32; DNA binding / transcription factor                                                                                                             | Not present                     |
| miR396 | AT1G71430 | 6 | -25,2 | unknown protein                                                                                                                                       | Not present                     |
| miR396 | AT1G77180 | 6 | -28,2 | chromatin protein family                                                                                                                              | Not present                     |
| miR396 | AT1G80050 | 6 | -25,4 | APT2 (ADENINE PHOSPHORIBOSYL TRANSFERASE 2); adenine phosphoribosyltransferase/ phosphate transmembrane transporter                                   | Not present                     |
| miR396 | AT2G44200 | 6 | -22,5 | unknown protein                                                                                                                                       | Not present                     |
| miR396 | AT3G15390 | 6 | -26,1 | SDE5 (silencing defective 5)                                                                                                                          | Not present                     |
| miR396 | AT4G24540 | 6 | -25,6 | AGL24 (AGAMOUS-LIKE 24); protein binding / protein heterodimerization/ protein homodimerization/ sequence-specific DNA binding / transcription factor | Not present                     |
| miR396 | AT4G25650 | 6 | -23,2 | ACD1-LIKE (ACD1-LIKE); 2 iron, 2 sulfur cluster binding / electron carrier/ oxidoreductase                                                            | Not present                     |
| miR396 | AT5G56010 | 6 | -30,0 | HSP81-3; ATP binding / unfolded protein binding                                                                                                       | Not present                     |
| miR396 | AT5G57655 | 6 | -24,8 | xylose isomerase family protein                                                                                                                       | Not present                     |
| miR396 | AT1G07380 | 5 | -25,9 | ceramidase family protein                                                                                                                             | Not present                     |

|        |           |   |       |                                                                                                                                                                                                                                                             |                      |
|--------|-----------|---|-------|-------------------------------------------------------------------------------------------------------------------------------------------------------------------------------------------------------------------------------------------------------------|----------------------|
| miR396 | AT1G08520 | 5 | -25,8 | CHLD; ATP binding / magnesium chelatase/ nucleoside-triphosphatase/ nucleotide binding                                                                                                                                                                      | Not present          |
| miR396 | AT1G79050 | 5 | -23,7 | DNA repair protein recA                                                                                                                                                                                                                                     | Not present          |
| miR396 | AT2G15790 | 5 | -25,3 | SQN (SQUINT); peptidyl-prolyl cis-trans isomerase                                                                                                                                                                                                           | Not present          |
| miR396 | AT2G44310 | 5 | -25,5 | calcium-binding EF hand family protein                                                                                                                                                                                                                      | Not present          |
| miR396 | AT3G09650 | 5 | -26,4 | HCF152 (HIGH CHLOROPHYLL FLUORESCENCE 152); mRNA binding                                                                                                                                                                                                    | Not present          |
| miR396 | AT3G15030 | 5 | -23,5 | TCP4 (TCP family transcription factor 4); transcription factor                                                                                                                                                                                              | Not present          |
| miR396 | AT3G26935 | 5 | -22,8 | zinc finger (DHHC type) family protein                                                                                                                                                                                                                      | Not present          |
| miR396 | AT3G42170 | 5 | -25,5 | DNA binding                                                                                                                                                                                                                                                 | Not present          |
| miR396 | AT3G56940 | 5 | -25,9 | CRD1 (COPPER RESPONSE DEFECT 1); DNA binding / magnesium-protoporphyrin IX monomethyl ester (oxidative) cyclase                                                                                                                                             | Not present          |
| miR396 | AT3G57990 | 5 | -26,7 | unknown protein                                                                                                                                                                                                                                             | Not present          |
| miR396 | AT4G02570 | 5 | -27,1 | ATCUL1 (ARABIDOPSIS THALIANA CULLIN 1); protein binding                                                                                                                                                                                                     | Not present          |
| miR396 | AT4G27410 | 5 | -24,8 | RD26 (RESPONSIVE TO DESICCATION 26); transcription activator/ transcription factor                                                                                                                                                                          | Not present          |
| miR396 | AT4G32600 | 5 | -23,8 | zinc finger (C3HC4-type RING finger) family protein                                                                                                                                                                                                         | Not present          |
| miR396 | AT4G39490 | 5 | -26,1 | CYP96A10; electron carrier/ heme binding / iron ion binding / monooxygenase                                                                                                                                                                                 | Not present          |
| miR396 | AT5G14620 | 5 | -29,3 | DRM2 (DOMAINS REARRANGED METHYLTRANSFERASE 2); N-methyltransferase                                                                                                                                                                                          | Not present          |
| miR396 | AT5G40770 | 5 | -27,5 | ATPHB3 (PROHIBITIN 3)                                                                                                                                                                                                                                       | Not present          |
| miR396 | AT5G63160 | 5 | -25,5 | BT1 (BTB AND TAZ DOMAIN PROTEIN 1); protein binding / transcription regulator                                                                                                                                                                               | Not present          |
| miR396 | AT1G03350 | 4 | -23,3 | BSD domain-containing protein                                                                                                                                                                                                                               | New potential target |
| miR396 | AT1G80260 | 4 | -27,8 | emb1427 (embryo defective 1427); tubulin binding                                                                                                                                                                                                            | New potential target |
| miR396 | AT3G15500 | 4 | -24,8 | ANAC055 (ARABIDOPSIS NAC DOMAIN CONTAINING PROTEIN 55); transcription factor                                                                                                                                                                                | New potential target |
| miR396 | AT3G18080 | 4 | -23,5 | BGLU44 (B-S GLUCOSIDASE 44); (R)-amygdalin beta-glucosidase/ 4-methylumbelliferyl-beta-D-glucopyranoside beta-glucosidase/ beta-gentiobiose beta-glucosidase/ cellobiose glucosidase/ esculin beta-glucosidase/ hydrolase, hydrolyzing O-glycosyl compounds | New potential target |
| miR396 | AT3G59660 | 4 | -22,6 | C2 domain-containing protein / GRAM domain-containing protein                                                                                                                                                                                               | New potential target |
| miR396 | AT5G58980 | 4 | -26,1 | ceramidase family protein                                                                                                                                                                                                                                   | New potential target |
| miR396 | AT1G07040 | 4 | -19,7 | unknown protein                                                                                                                                                                                                                                             | Not present          |
| miR396 | AT1G08630 | 4 | -26,0 | THA1 (Threonine Aldolase 1); aldehyde-lyase/ threonine aldolase                                                                                                                                                                                             | Not present          |
| miR396 | AT1G10950 | 4 | -22,8 | endomembrane protein 70, putative                                                                                                                                                                                                                           | Not present          |
| miR396 | AT1G23800 | 4 | -23,4 | ALDH2B7; 3-chloroallyl aldehyde dehydrogenase/ aldehyde dehydrogenase (NAD)                                                                                                                                                                                 | Not present          |
| miR396 | AT1G36160 | 4 | -24,3 | ACC1 (ACETYL-COENZYME A                                                                                                                                                                                                                                     | Not present          |

|        |           |    |       |                                                                                                                                                                    |             |
|--------|-----------|----|-------|--------------------------------------------------------------------------------------------------------------------------------------------------------------------|-------------|
| miR396 | AT1G60770 | 4  | -23,0 | CARBOXYLASE 1); acetyl-CoA carboxylase                                                                                                                             | Not present |
| miR396 | AT1G75510 | 4  | -20,2 | pentatricopeptide (PPR) repeat-containing protein                                                                                                                  | Not present |
| miR396 | AT1G79920 | 4  | -24,5 | transcription initiation factor IIF beta subunit (TFIIF-beta) family protein                                                                                       | Not present |
| miR396 | AT2G30110 | 4  | -25,2 | ATP binding                                                                                                                                                        | Not present |
| miR396 | AT2G37230 | 4  | -23,9 | ATUBA1; ubiquitin activating enzyme/ubiquitin-protein ligase                                                                                                       | Not present |
| miR396 | AT2G38010 | 4  | -23,6 | pentatricopeptide (PPR) repeat-containing protein                                                                                                                  | Not present |
| miR396 | AT2G45320 | 4  | -22,2 | ceramidase family protein                                                                                                                                          | Not present |
| miR396 | AT3G04520 | 4  | -26,3 | unknown protein                                                                                                                                                    | Not present |
| miR396 | AT3G04710 | 4  | -27,2 | THA2 (Threonine Aldolase 2); threonine aldolase                                                                                                                    | Not present |
| miR396 | AT3G25800 | 4  | -21,2 | ankyrin repeat family protein                                                                                                                                      | Not present |
| miR396 | AT3G51800 | 4  | -30,7 | PP2AA2 (PROTEIN PHOSPHATASE 2A SUBUNIT A2); protein phosphatase type 2A regulator                                                                                  | Not present |
| miR396 | AT3G54340 | 4  | -24,1 | ATG2; aminopeptidase/metalloexopeptidase                                                                                                                           | Not present |
| miR396 | AT3G57410 | 4  | -20,5 | AP3 (APETALA 3); DNA binding / transcription factor                                                                                                                | Not present |
| miR396 | AT4G22290 | 4  | -25,1 | VLN3 (VILLIN 3); actin binding                                                                                                                                     | Not present |
| miR396 | AT4G34270 | 4  | -28,8 | ubiquitin thiolesterase                                                                                                                                            | Not present |
| miR396 | AT4G38810 | 4  | -25,5 | TIP41-like family protein                                                                                                                                          | Not present |
| miR396 | AT5G03540 | 4  | -24,3 | calcium-binding EF hand family protein                                                                                                                             | Not present |
| miR396 | AT5G22620 | 4  | -23,1 | ATEXO70A1 (exocyst subunit EXO70 family protein A1); protein binding                                                                                               | Not present |
| miR396 | AT5G23550 | 4  | -19,9 | phosphoglycerate/bisphosphoglycerate mutase family protein                                                                                                         | Not present |
| miR396 | AT5G26360 | 4  | -19,9 | chaperonin, putative                                                                                                                                               | Not present |
| miR396 | AT5G47650 | 4  | -22,5 | ATNUDT2 (ARABIDOPSIS THALIANA NUDIX HYDROLASE HOMOLOG 2); ADP-ribose diphosphatase/ NAD or NADH binding / hydrolase                                                | Not present |
| miR396 | AT5G62670 | 4  | -24,3 | AHA11 (Arabidopsis H(+)-ATPase 11); ATPase                                                                                                                         | Not present |
| miR396 | ATMG00860 | 4  | -23,5 |                                                                                                                                                                    | Not present |
| miR397 | AT5G60020 | 24 | -31,0 | LAC17 (laccase 17); laccase                                                                                                                                        | Validated   |
| miR397 | AT2G38080 | 16 | -32,8 | IRX12 (IRREGULAR XYLEM 12); laccase                                                                                                                                | Validated   |
| miR397 | AT3G09220 | 16 | -33,0 | LAC7 (laccase 7); laccase                                                                                                                                          | Not present |
| miR397 | AT4G34480 | 12 | -26,3 | catalytic/ cation binding / hydrolase, hydrolyzing O-glycosyl compounds                                                                                            | Not present |
| miR397 | AT3G04120 | 11 | -24,3 | GAPC1 (GLYCERALDEHYDE-3-PHOSPHATE DEHYDROGENASE C SUBUNIT 1); glyceraldehyde-3-phosphate dehydrogenase (phosphorylating)/ glyceraldehyde-3-phosphate dehydrogenase | Not present |
| miR397 | AT5G03260 | 11 | -29,2 | LAC11 (laccase 11); laccase                                                                                                                                        | Not present |
| miR397 | AT2G29130 | 10 | -33,0 | LAC2 (laccase 2); laccase                                                                                                                                          | Validated   |
| miR397 | AT1G54100 | 7  | -28,1 | ALDH7B4 (Aldehyde Dehydrogenase 7B4); 3-chloroallyl aldehyde dehydrogenase/ oxidoreductase                                                                         | Not present |
| miR397 | AT5G05390 | 7  | -31,8 | LAC12 (laccase 12); laccase                                                                                                                                        | Not present |

|        |           |    |       |                                                                                                                                                                                                      |                      |
|--------|-----------|----|-------|------------------------------------------------------------------------------------------------------------------------------------------------------------------------------------------------------|----------------------|
| miR397 | AT2G30210 | 6  | -30,4 | LAC3 (laccase 3); laccase                                                                                                                                                                            | Not present          |
| miR397 | AT4G35335 | 6  | -26,1 | nucleotide-sugar transmembrane transporter/ sugar:hydrogen symporter                                                                                                                                 | Not present          |
| miR397 | AT1G13440 | 5  | -25,1 | GAPC2 (GLYCERALDEHYDE-3-PHOSPHATE DEHYDROGENASE C2); NAD or NADH binding / binding / catalytic/ glyceraldehyde-3-phosphate dehydrogenase (phosphorylating)/ glyceraldehyde-3-phosphate dehydrogenase | Not present          |
| miR397 | AT1G60550 | 5  | -24,3 | ECHID (ENOYL-COA HYDRATASE/ISOMERASE D); catalytic/ naphthoate synthase                                                                                                                              | Not present          |
| miR397 | AT4G00730 | 5  | -22,8 | ANL2 (ANTHOCYANINLESS 2); transcription factor/ transcription regulator                                                                                                                              | Not present          |
| miR397 | AT5G59850 | 5  | -25,2 | 40S ribosomal protein S15A (RPS15aF)                                                                                                                                                                 | Not present          |
| miR397 | AT2G39800 | 4  | -24,9 | P5CS1 (DELTA1-PYRROLINE-5-CARBOXYLATE SYNTHASE 1); delta1-pyrroline-5-carboxylate synthetase                                                                                                         | New potential target |
| miR397 | AT5G11550 | 4  | -22,8 | binding                                                                                                                                                                                              | New potential target |
| miR397 | AT1G63850 | 4  | -25,6 | PRLI-interacting factor-related                                                                                                                                                                      | Not present          |
| miR397 | AT1G64680 | 4  | -28,7 | unknown protein                                                                                                                                                                                      | Not present          |
| miR397 | AT1G68060 | 4  | -26,4 | ATMAP70-1 (microtubule-associated proteins 70-1); microtubule binding                                                                                                                                | Not present          |
| miR397 | AT2G40370 | 4  | -32,3 | LAC5 (laccase 5); laccase                                                                                                                                                                            | Not present          |
| miR397 | AT3G16980 | 4  | -29,1 | NRPB9A; DNA binding / DNA-directed RNA polymerase/ nucleic acid binding / transcription regulator/ zinc ion binding                                                                                  | Not present          |
| miR397 | AT5G02500 | 4  | -23,4 | HSC70-1 (HEAT SHOCK COGNATE PROTEIN 70-1); ATP binding                                                                                                                                               | Not present          |
| miR397 | AT5G47030 | 4  | -26,6 | ATP synthase delta" chain, mitochondrial                                                                                                                                                             | Not present          |
| miR397 | AT5G48100 | 4  | -28,4 | TT10 (TRANSPARENT TESTA 10); copper ion binding / laccase                                                                                                                                            | Not present          |
| miR397 | AT5G50850 | 4  | -25,5 | MAB1 (MACCI-BOU); catalytic/ pyruvate dehydrogenase (acetyl-transferring)                                                                                                                            | Not present          |
| miR398 | AT1G08830 | 42 | -30,1 | CSD1 (COPPER/ZINC SUPEROXIDE DISMUTASE 1); superoxide dismutase                                                                                                                                      | Validated            |
| miR398 | AT1G12520 | 18 | -33,4 | ATCCS (COPPER CHAPERONE FOR SOD1); superoxide dismutase/ superoxide dismutase copper chaperone                                                                                                       | Validated            |
| miR398 | AT3G15640 | 16 | -31,2 | cytochrome c oxidase family protein                                                                                                                                                                  | Validated            |
| miR398 | AT5G20230 | 10 | -27,6 | ATBCB (ARABIDOPSIS BLUE-COPPER-BINDING PROTEIN); copper ion binding / electron carrier                                                                                                               | Not present          |
| miR398 | AT2G28190 | 6  | -33,1 | CSD2 (COPPER/ZINC SUPEROXIDE DISMUTASE 2); superoxide dismutase                                                                                                                                      | Not present          |
| miR398 | AT3G09390 | 6  | -31,3 | MT2A (METALLOTHIONEIN 2A); copper ion binding                                                                                                                                                        | Not present          |
| miR398 | AT3G47420 | 5  | -30,9 | glycerol-3-phosphate transporter, putative / glycerol 3-phosphate permease, putative                                                                                                                 | Not present          |
| miR398 | AT4G14030 | 5  | -30,0 | SBP1 (selenium-binding protein 1); selenium binding                                                                                                                                                  | Not present          |
| miR398 | AT5G02380 | 5  | -31,8 | MT2B (METALLOTHIONEIN 2B); copper ion binding                                                                                                                                                        | Not present          |
| miR398 | AT5G47900 | 5  | -27,6 | unknown protein                                                                                                                                                                                      | Not present          |
| miR398 | AT1G80230 | 4  | -31,0 | cytochrome c oxidase family protein                                                                                                                                                                  | Not present          |
| miR399 | AT2G33770 | 5  | -36,2 | PHO2 (PHOSPHATE 2); ubiquitin-                                                                                                                                                                       | Validated            |



|        |           |    |       |                                                                                                                                                            |                                 |
|--------|-----------|----|-------|------------------------------------------------------------------------------------------------------------------------------------------------------------|---------------------------------|
|        |           |    |       | protein ligase                                                                                                                                             |                                 |
| miR399 | AT5G60760 | 5  | -22,8 | 2-phosphoglycerate kinase-related                                                                                                                          | Not present                     |
| miR399 | AT3G45090 | 4  | -22,8 | 2-phosphoglycerate kinase-related                                                                                                                          | Not present                     |
| miR399 | AT4G23160 | 4  | -25,9 | protein kinase family protein                                                                                                                              | Not present                     |
| miR399 | AT4G36250 | 4  | -23,0 | ALDH3F1 (Aldehyde Dehydrogenase 3F1); 3-chloroallyl aldehyde dehydrogenase/ aldehyde dehydrogenase (NAD)                                                   | Not present                     |
| miR408 | AT2G02850 | 33 | -38,3 | ARNP (PLANTACYANIN); copper ion binding / electron carrier                                                                                                 | Validated                       |
| miR408 | AT1G72230 | 23 | -33,8 | plastocyanin-like domain-containing protein                                                                                                                | Validated                       |
| miR408 | AT5G21930 | 22 | -34,7 | PAA2 (P-TYPE ATPASE OF ARABIDOPSIS 2); ATPase, coupled to transmembrane movement of ions, phosphorylative mechanism / copper ion transmembrane transporter | New potential target: validated |
| miR408 | AT3G22110 | 20 | -28,5 | PAC1; endopeptidase/ peptidase/ threonine-type endopeptidase                                                                                               | New potential target: validated |
| miR408 | AT5G05390 | 16 | -30,3 | LAC12 (laccase 12); laccase                                                                                                                                | Validated                       |
| miR408 | AT1G22480 | 15 | -32,0 | plastocyanin-like domain-containing protein                                                                                                                | Not present                     |
| miR408 | AT5G40200 | 13 | -26,6 | DegP9 (DegP protease 9); catalytic/ protein binding / serine-type endopeptidase/ serine-type peptidase                                                     | Not present                     |
| miR408 | AT2G40370 | 11 | -30,5 | LAC5 (laccase 5); laccase                                                                                                                                  | Not present                     |
| miR408 | AT1G19440 | 10 | -29,8 | KCS4 (3-KETOACYL-COA SYNTHASE 4); acyltransferase/ catalytic/ transferase, transferring acyl groups other than amino-acyl groups                           | Not present                     |
| miR408 | AT3G60270 | 10 | -33,2 | uclacyanin, putative                                                                                                                                       | Not present                     |
| miR408 | AT5G43130 | 9  | -28,3 | TAF4 (TBP-ASSOCIATED FACTOR 4); transcription initiation factor                                                                                            | New potential target            |
| miR408 | AT3G60280 | 9  | -37,4 | UCC3 (UCLACYANIN 3); copper ion binding / electron carrier                                                                                                 | Not present                     |
| miR408 | AT3G62600 | 8  | -26,3 | ATERDJ3B; heat shock protein binding / unfolded protein binding                                                                                            | Not present                     |
| miR408 | AT4G04340 | 8  | -28,4 | early-responsive to dehydration protein-related / ERD protein-related                                                                                      | Not present                     |
| miR408 | AT2G32300 | 7  | -32,7 | UCC1 (UCLACYANIN 1); copper ion binding / electron carrier                                                                                                 | Not present                     |
| miR408 | AT4G20070 | 7  | -29,3 | ATAAH (Arabidopsis thaliana Allantoate Amidohydrolase); allantoate deiminase/ metallopeptidase                                                             | Not present                     |
| miR408 | AT4G22120 | 7  | -26,6 | early-responsive to dehydration protein-related / ERD protein-related                                                                                      | Not present                     |
| miR408 | AT5G11480 | 7  | -26,5 | GTP binding                                                                                                                                                | Not present                     |
| miR408 | AT1G23380 | 6  | -27,6 | KNAT6; DNA binding / transcription activator/ transcription factor                                                                                         | Not present                     |
| miR408 | AT2G42070 | 6  | -31,6 | ATNUDX23 (ARABIDOPSIS THALIANA NUDIX HYDROLASE HOMOLOG 23); FAD diphosphatase/ hydrolase                                                                   | Not present                     |
| miR408 | AT3G01180 | 6  | -28,0 | AtSS2 (starch synthase 2); transferase, transferring glycosyl groups                                                                                       | Not present                     |
| miR408 | AT5G19350 | 6  | -27,1 | RNA-binding protein 45 (RBP45), putative                                                                                                                   | Not present                     |
| miR408 | AT2G30210 | 5  | -30,3 | LAC3 (laccase 3); laccase                                                                                                                                  | Validated                       |
| miR408 | AT1G01090 | 5  | -28,7 | PDH-E1 ALPHA (PYRUVATE DEHYDROGENASE E1 ALPHA); pyruvate dehydrogenase (acetyl-                                                                            | Not present                     |

|        |           |   |       |                                                                                                                                 |                      |
|--------|-----------|---|-------|---------------------------------------------------------------------------------------------------------------------------------|----------------------|
|        |           |   |       | transferring)                                                                                                                   |                      |
| miR408 | AT1G68560 | 5 | -29,0 | XYL1 (ALPHA-XYLOSIDASE 1); alpha-N-arabinofuranosidase/ hydrolase, hydrolyzing O-glycosyl compounds / xylan 1,4-beta-xylosidase | Not present          |
| miR408 | AT1G78680 | 5 | -22,8 | ATGGH2 (gamma-glutamyl hydrolase 2); omega peptidase                                                                            | Not present          |
| miR408 | AT2G19130 | 5 | -27,9 | S-locus lectin protein kinase family protein                                                                                    | Not present          |
| miR408 | AT2G20580 | 5 | -21,5 | RPN1A (26S PROTEASOME REGULATORY SUBUNIT S2 1A); binding / enzyme regulator                                                     | Not present          |
| miR408 | AT3G02360 | 5 | -30,7 | 6-phosphogluconate dehydrogenase family protein                                                                                 | Not present          |
| miR408 | AT3G49080 | 5 | -23,4 | ribosomal protein S9 family protein                                                                                             | Not present          |
| miR408 | AT3G56370 | 5 | -29,9 | leucine-rich repeat transmembrane protein kinase, putative                                                                      | Not present          |
| miR408 | AT4G24330 | 5 | -24,8 | unknown protein                                                                                                                 | Not present          |
| miR408 | AT5G26330 | 5 | -37,9 | plastocyanin-like domain-containing protein / mavycyanin, putative                                                              | Not present          |
| miR408 | AT5G52520 | 5 | -25,6 | OVA6 (OVULE ABORTION 6); ATP binding / aminoacyl-tRNA ligase/ nucleotide binding / proline-tRNA ligase                          | Not present          |
| miR408 | AT1G26690 | 4 | -28,9 | emp24/gp25L/p24 family protein                                                                                                  | Not present          |
| miR408 | AT1G78060 | 4 | -25,6 | glycosyl hydrolase family 3 protein                                                                                             | Not present          |
| miR408 | AT2G16440 | 4 | -29,3 | DNA replication licensing factor, putative                                                                                      | Not present          |
| miR408 | AT2G27510 | 4 | -28,2 | ATFD3 (ferredoxin 3); 2 iron, 2 sulfur cluster binding / electron carrier/ iron-sulfur cluster binding                          | Not present          |
| miR408 | AT2G38130 | 4 | -28,9 | ATMAK3; N-acetyltransferase                                                                                                     | Not present          |
| miR408 | AT3G06880 | 4 | -26,6 | nucleotide binding                                                                                                              | Not present          |
| miR408 | AT3G21620 | 4 | -25,1 | early-responsive to dehydration protein-related / ERD protein-related                                                           | Not present          |
| miR408 | AT3G22330 | 4 | -33,7 | PMH2 (putative mitochondrial RNA helicase 2); ATP binding / ATP-dependent helicase/ helicase/ nucleic acid binding              | Not present          |
| miR408 | AT3G52120 | 4 | -28,7 | SWAP (Suppressor-of-White-APricot)/surp domain-containing protein / D111/G-patch domain-containing protein                      | Not present          |
| miR408 | AT4G02590 | 4 | -30,9 | UNE12 (unfertilized embryo sac 12); DNA binding / transcription factor                                                          | Not present          |
| miR408 | AT4G08150 | 4 | -27,6 | KNAT1 (KNOTTED-LIKE FROM ARABIDOPSIS THALIANA); transcription factor                                                            | Not present          |
| miR408 | AT4G11740 | 4 | -26,7 | SAY1                                                                                                                            | Not present          |
| miR408 | AT4G23160 | 4 | -28,9 | protein kinase family protein                                                                                                   | Not present          |
| miR408 | AT5G03530 | 4 | -30,4 | RABC2A (RAB GTPASE HOMOLOG C2A); GTP binding / GTP-dependent protein binding / myosin XI tail binding                           | Not present          |
| miR408 | AT5G22460 | 4 | -29,5 | esterase/lipase/thioesterase family protein                                                                                     | Not present          |
| miR408 | AT5G59950 | 4 | -31,6 | RNA and export factor-binding protein, putative                                                                                 | Not present          |
| miR408 | AT5G65220 | 4 | -32,7 | ribosomal protein L29 family protein                                                                                            | Not present          |
| miR827 | AT1G71790 | 9 | -29,8 | F-actin capping protein beta subunit family protein                                                                             | Not present          |
| miR827 | AT5G22850 | 8 | -27,5 | aspartyl protease family protein                                                                                                | New potential target |
| miR827 | AT1G07140 | 7 | -24,7 | SIRANBP; Ran GTPase binding                                                                                                     | New potential target |

|        |           |   |       |                                                                                                                                 |                      |
|--------|-----------|---|-------|---------------------------------------------------------------------------------------------------------------------------------|----------------------|
| miR827 | AT2G44530 | 7 | -24,5 | ribose-phosphate pyrophosphokinase, putative / phosphoribosyl diphosphate synthetase, putative                                  | New potential target |
| miR827 | AT1G02130 | 7 | -22,4 | ARA-5 (ARABIDOPSIS RAS 5); GTP binding                                                                                          | Not present          |
| miR827 | AT1G24490 | 7 | -23,7 | ALB4 (ALBINA 4)                                                                                                                 | Not present          |
| miR827 | AT4G22990 | 7 | -27,4 | SPX (SYG1/Pho81/XPR1) domain-containing protein                                                                                 | Not present          |
| miR827 | AT2G39840 | 6 | -22,1 | TOPP4; protein serine/threonine phosphatase                                                                                     | Not present          |
| miR827 | AT3G22750 | 6 | -25,4 | protein kinase, putative                                                                                                        | Not present          |
| miR827 | AT4G23160 | 6 | -24,9 | protein kinase family protein                                                                                                   | Not present          |
| miR827 | AT5G58590 | 6 | -24,1 | RANBP1 (RAN BINDING PROTEIN 1); protein binding                                                                                 | Not present          |
| miR827 | AT5G59240 | 6 | -27,6 | 40S ribosomal protein S8 (RPS8B)                                                                                                | Not present          |
| miR827 | AT1G11720 | 5 | -25,2 | ATSS3 (starch synthase 3); starch synthase/ transferase, transferring glycosyl groups                                           | New potential target |
| miR827 | AT1G12780 | 5 | -24,4 | UGE1 (UDP-D-glucose/UDP-D-galactose 4-epimerase 1); UDP-glucose 4-epimerase/ protein dimerization                               | Not present          |
| miR827 | AT2G45300 | 5 | -25,7 | 3-phosphoshikimate 1-carboxyvinyltransferase / 5-enolpyruvylshikimate-3-phosphate / EPSP synthase                               | Not present          |
| miR827 | AT2G46090 | 5 | -24,5 | diacylglycerol kinase family protein                                                                                            | Not present          |
| miR827 | AT3G55580 | 5 | -24,9 | regulator of chromosome condensation (RCC1) family protein                                                                      | Not present          |
| miR827 | AT4G11810 | 5 | -29,6 | SPX (SYG1/Pho81/XPR1) domain-containing protein                                                                                 | Not present          |
| miR827 | AT4G14000 | 5 | -27,0 | unknown protein                                                                                                                 | Not present          |
| miR827 | AT5G17190 | 5 | -24,2 | unknown protein                                                                                                                 | Not present          |
| miR827 | AT5G48970 | 5 | -23,3 | mitochondrial substrate carrier family protein                                                                                  | Not present          |
| miR827 | AT5G51070 | 5 | -23,0 | ERD1 (EARLY RESPONSIVE TO DEHYDRATION 1); ATP binding / ATPase/ nucleoside-triphosphatase/ nucleotide binding / protein binding | Not present          |
| miR827 | AT5G51230 | 5 | -26,2 | EMF2 (EMBRYONIC FLOWER 2); DNA binding / transcription factor                                                                   | Not present          |
| miR827 | AT1G63010 | 4 | -28,8 | SPX (SYG1/Pho81/XPR1) domain-containing protein                                                                                 | Validated            |
| miR827 | AT2G36670 | 4 | -28,2 | aspartyl protease family protein                                                                                                | New potential target |
| miR827 | AT1G30910 | 4 | -23,0 | molybdenum cofactor sulfurase family protein                                                                                    | Not present          |
| miR827 | AT1G43670 | 4 | -26,0 | fructose-1,6-bisphosphatase, putative / D-fructose-1,6-bisphosphate 1-phosphohydrolase, putative / FBPase, putative             | Not present          |
| miR827 | AT2G02560 | 4 | -23,7 | CAND1 (CULLIN-ASSOCIATED AND NEDDYLATION DISSOCIATED); binding                                                                  | Not present          |
| miR827 | AT2G34250 | 4 | -21,3 | protein transport protein sec61, putative                                                                                       | Not present          |
| miR827 | AT3G08720 | 4 | -29,5 | S6K2 (ARABIDOPSIS THALIANA SERINE/THREONINE PROTEIN KINASE 2); kinase/ protein kinase                                           | Not present          |
| miR827 | AT3G17810 | 4 | -25,3 | dihydroorotate dehydrogenase family protein / dihydroorotate oxidase family protein                                             | Not present          |
| miR827 | AT3G47810 | 4 | -26,7 | MAG1 (MAIGO 1); hydrolase/ protein                                                                                              | Not present          |

|        |           |   |       |                                                                                                   |             |
|--------|-----------|---|-------|---------------------------------------------------------------------------------------------------|-------------|
|        |           |   |       | serine/threonine phosphatase                                                                      |             |
| miR827 | AT3G52260 | 4 | -26,0 | pseudouridine synthase family protein                                                             | Not present |
| miR827 | AT3G52750 | 4 | -21,5 | FTSZ2-2; GTP binding / GTPase/<br>structural molecule                                             | Not present |
| miR827 | AT4G15545 | 4 | -23,0 | unknown protein                                                                                   | Not present |
| miR827 | AT4G33410 | 4 | -22,9 | signal peptide peptidase family protein                                                           | Not present |
| miR827 | AT5G01960 | 4 | -21,6 | zinc finger (C3HC4-type RING finger)<br>family protein                                            | Not present |
| miR827 | AT5G03900 | 4 | -23,1 |                                                                                                   | Not present |
| miR827 | AT5G13030 | 4 | -27,1 | unknown protein                                                                                   | Not present |
| miR827 | AT5G25560 | 4 | -17,5 | zinc finger (C3HC4-type RING finger)<br>family protein                                            | Not present |
| miR827 | AT5G28050 | 4 | -19,4 | cytidine/deoxycytidylate deaminase<br>family protein                                              | Not present |
| miR827 | AT5G40990 | 4 | -23,0 | GLIP1 (GDSSL LIPASE1);<br>carboxylesterase/ lipase                                                | Not present |
| miR827 | AT5G51340 | 4 | -21,3 | unknown protein                                                                                   | Not present |
| miR827 | AT5G53350 | 4 | -25,1 | CLPX; ATP binding / ATPase/<br>nucleoside-triphosphatase/ nucleotide<br>binding / protein binding | Not present |

---

**Supplementary table 7. Oligonucleotide primers used for RT-qPCR.**

| Gene  | Locus ID  | Forward primer           | Reverse Primer            |
|-------|-----------|--------------------------|---------------------------|
| PAA2  | At5g21930 | GTCCTCTTATCAGGGGACAGG    | CATAGTTGCTTGTGCAAGACTCAG  |
| MYB33 | At5g06100 | CTATGGAAACCGACATTCACCTG  | CTTGGCTTCCAGAAGCAACATATCG |
| NZZ   | At4g27330 | TCGGGTCAGGTTATGATCGA     | AGGGTTTCCTTCCATGTAGCTCC   |
| PP2A  | At1g13320 | CCTGCGGTAATAACTGCATCT    | CTTCACTTAGCTCCACCAAGCA    |
| tMT2A | tobacco   | TACCCAGATTTGAGCTACAACGAG | GCAGGAGATTCACCCATTTCCATA  |
| tMT2B | tobacco   | TACCCAGATTTGAGCTACAACGAA | AGGGGATTCACCCATTTCCATT    |

**Supplementary table 8. Oligonucleotide primers used for 5' RACE.**

| Gene                 | Locus ID  | 5' race                                  | 5' race nested                      |
|----------------------|-----------|------------------------------------------|-------------------------------------|
| General              |           | CGACTGGAGCACGAGGACACT<br>GA              | GGACTGACATGGACTGAAGGAGT<br>A        |
| PAA2                 | At5g21930 | GACTTATGGAGCTGCAGAAGT<br>AATG            | CATAGTTGCTTGTGCAAGACTCAG            |
| IAR3                 | At1g51760 | ATCTTCTGATCCCATTAATGGT<br>TGCATCTCG      | CATATTCACGCTCGCTTGCCTTGTGA<br>TAACC |
| NZZ                  | At4g27330 | CATTTAAAGCTTCAAGGACAAA<br>TCAATGGTATTAGG | AGGGTTTCCTTCCATGTAGCTCC             |
| MMG4.7               | At5g43060 | ATGGTAACAACCTTAGCATTTT<br>TCC            | CTTCGGTATCAATACCCWCCATT             |
| UDP                  | At2g47650 | AATGGGCCGACATGTTCTCC                     | CCTCGGTGATAGTCCATGGT                |
| SVP                  | At2g22540 | GCAACTTTCCTTCATTCATC                     | TTTCATCTGCCTCAGCTCAC                |
| loricrin-<br>related | AT5g64550 | ACCATGAGCTTTGCAGTAGT                     | CCTCAGCACTTCGTGTACAG                |
|                      | At3g14110 | CGGAAGGATCAGTCAGTCTC                     | CCCAGCTCGGTATAACAGTC                |
|                      | At3g22110 | GTTTCATCGCCAAAGGTAAC                     | CCAGGCGAATAAGACTAGAG                |
| AVA-P2               | At1g19910 | CTCTAGACTGACCAGCTCGA                     | GGATGATACCAACAATGAGA                |

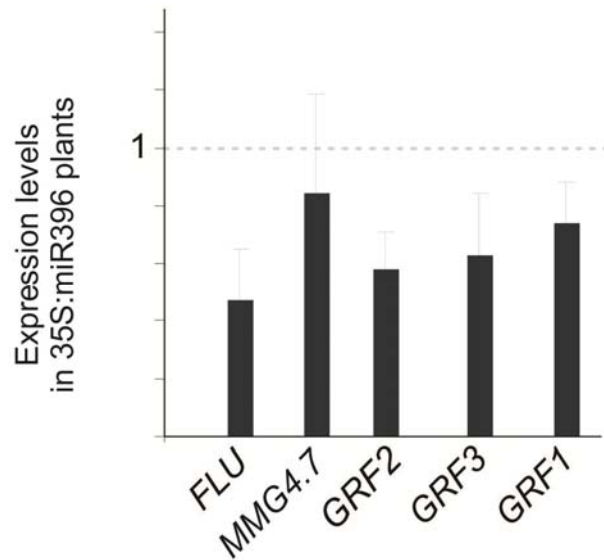

**Supplementary Figure 1:** Transcript levels of miR396 targets in transgenic plants overexpressing the miRNA.

The RNA levels were determined by RT-qPCR (ten days old seedlings) and are relative to transgenic plants harboring an empty vector (dashed line). Data shown are mean  $\pm$  SEM of 3 biological replicates.

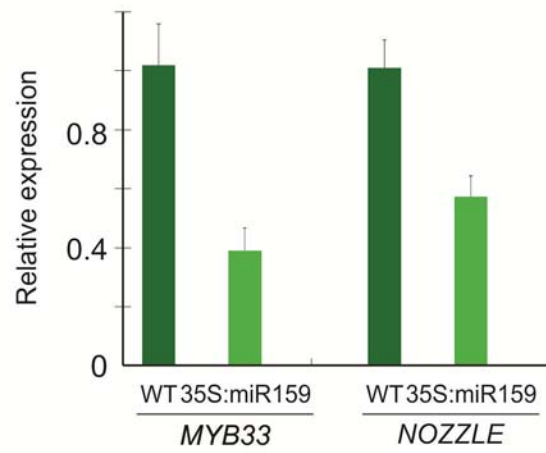

**Supplementary Figure 2:** Transcript levels of *MYB33* and *NOZZLE* in transgenic plants overexpressing miR159. The RNA levels were determined by RT-qPCR (inflorescences). Data shown are mean  $\pm$  SEM of 3 biological replicates.

**A** *PAA2*

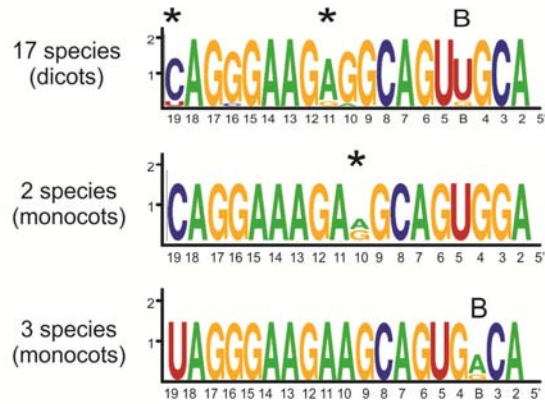

**C** *MMG4.7*

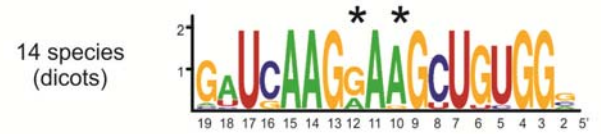

**D** *FLU*

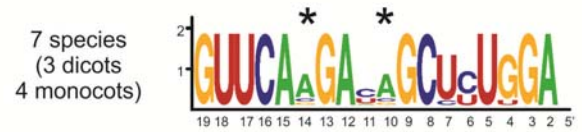

**B** *PAC1*

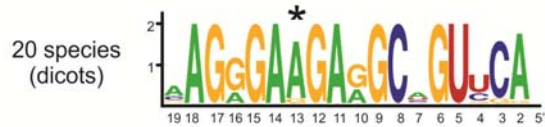

**Supplementary Figure 3:** Presence of GU interactions in the new miRNA targets pairs. Weblogo of the sequences from different species. The asterisk represents the position where C/U and A/G alternates generating a C/U-G or A/G-U interaction respectively with the miRNA. B represents a bulge. In the case of *PAA2* the position of the bulge nucleotide varies between dicot and monocot species and the alignments are presented separately.
